# Supplementary material for: Cobalt oxide functionalized nanoporous carbon electrodes and their excellent supercapacitive performance
Source: Royal Society of Chemistry journal article supplement (doi:10.1039/c4ra14041a), 2015-01-01
Supplement: c4ra14041a1.pdf [file c4ra14041a1.pdf]

## Cobalt oxide functionalized nanoporous carbon electrodes and their excellent supercapacitive performance

Dattatray S. Dhawale,<sup>a,b</sup> Gurudas P. Mane,<sup>b</sup> Stalin Joseph,<sup>a</sup> Siddulu N. Talapaneni,<sup>b</sup> Chokkalingam Anand,<sup>a,b</sup> Ajayan Mano,<sup>b</sup> Salem S. Aldeyab,<sup>c</sup> Kripal S. Lakhi,<sup>a</sup> and Ajayan Vinu<sup>\*a,b</sup>

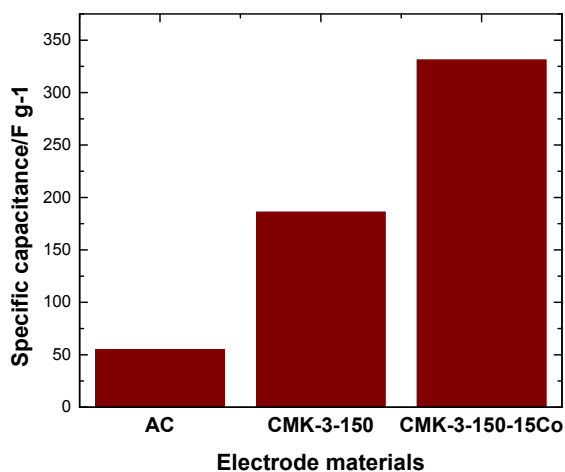

**Fig. S1.** Variation specific capacitance of AC, CMK-3-150 and CMK-3-15-15Co electrodes.
